# Supplementary material for: Draft Genome Sequence of Priestia sp. Strain TSO9, a Plant Growth-Promoting Bacterium Associated with Wheat (Triticum turgidum subsp. durum) in the Yaqui Valley, Mexico
Source: MDPI journal article supplement (doi:10.3390/plants11172231), 2022-08-28
Supplement: s1 [file s1]

# Draft Genome Sequence of *Priestia* sp. Strain TSO9, a Plant Growth-Promoting Bacterium Associated with Wheat (*Triticum turgidum* subsp. *durum*) in the Yaqui Valley, Mexico

Maria Edith Ortega-Urquieta <sup>1,†</sup>, Valeria Valenzuela-Ruiz <sup>1,†</sup>, Debasis Mitra <sup>2</sup>, Sajjad Hyder <sup>3</sup>, Nabil I. Elsheery <sup>4</sup>, Pradeep Kumar Das Mohapatra <sup>2</sup>, Fannie Isela Parra-Cota <sup>5,\*</sup> and Sergio de los Santos-Villalobos <sup>1,\*</sup>

<sup>1</sup> Instituto Tecnológico de Sonora, 5 de febrero 818 sur, 85000 Ciudad Obregon, Mexico

<sup>2</sup> Department of Microbiology, Raiganj University, Raiganj 733 134, Uttar Dinajpur, West Bengal India, India

<sup>3</sup> Department of Botany, Government College Women University Sialkot, 51310 Sialkot, Pakistan

<sup>4</sup> Agricultural Botany Department, Faculty of Agriculture, Tanta University, Tanta 31527, Egypt

<sup>5</sup> Campo Experimental Norman E. Borlaug, Instituto Nacional de Investigaciones Forestales, Agrícolas y Pecuarias, Ciudad Obregon P.C. 85000, Sonora, Mexico

\* Correspondence: parra.fannie@inifap.gob.mx (F.I.P.-C.); sergio.delossantos@itson.edu.mx (S.d.l.S.-V.)

† These authors contributed equally to this work.

**Table S1.** Features of strain TSO9 genome by RAST (bacteriocins and ribosomally synthesized antibacterial peptides, resistance to antibiotics and toxic compounds, invasion and intracellular resistance, auxin biosynthesis, phosphorous metabolism, siderophores, osmotic stress response, and oxidative stress response).

| Protein                                                                | Function                                                    |
|------------------------------------------------------------------------|-------------------------------------------------------------|
| <b>Bacteriocins and ribosomally synthesized antibacterial peptides</b> |                                                             |
| BceB                                                                   | Bacitracin export permease protein BceB                     |
| BceA                                                                   | Bacitracin export ATP-binding protein BceA                  |
| BceS                                                                   | Two-component sensor histidine kinase BceS                  |
| BceR                                                                   | Two-component response regulator BceR                       |
| LiaR                                                                   | Response regulator LiaR                                     |
| LiaS                                                                   | Sensor histidine kinase LiaS                                |
| LiaF                                                                   | Transporter LiaF                                            |
| LiaG                                                                   | Conserved protein LiaG in <i>B. subtilis</i> in Lia cluster |
| LiaH                                                                   | Protein LiaH, similar to phage shock protein A              |
| LiaI                                                                   | Protein LiaI                                                |
| YvcP                                                                   | Two-component response regulator YvcP                       |
| YvcQ                                                                   | Two-component sensor kinase YvcQ                            |
| YvcR                                                                   | ABC transporter ATP-binding protein YvcR                    |
| YvcS                                                                   | ABC transporter permease protein YvcS                       |

### **Resistance to antibiotics and toxic compounds**

|       |                                                                                                   |
|-------|---------------------------------------------------------------------------------------------------|
| CRTR  | Cu(I)-responsive transcriptional regulator                                                        |
| CIA   | Copper-translocating P-type ATPase (EC 3.6.3.4)                                                   |
| CopZ  | Copper chaperone                                                                                  |
| HP    | hypothetical protein PFL_0711                                                                     |
| CIfA  | Multidrug resistance transporter, Bcr/CfIA family                                                 |
| MO    | Multicopper oxidase                                                                               |
| BCO   | Blue copper oxidase CueO precursor                                                                |
| CT    | Copper tolerance protein                                                                          |
| Cc    | Cytochrome c family protein                                                                       |
| Cc1   | FIG002261: Cytochrome c family protein                                                            |
| Cc2   | FIG135464: Cytochrome c4                                                                          |
| p553  | Putative diheme cytochrome c-553                                                                  |
| CBPP  | Copper-binding periplasmic protein                                                                |
| PCLP  | putative cytochrome C-like protein                                                                |
| ErfK  | ErfK/YbiS/YcfS/YnhG family protein                                                                |
| CcmI  | Cytochrome c heme lyase subunit CcmL                                                              |
| cycH  | Cytochrome c-type biogenesis protein Cych                                                         |
| CcmG  | Cytochrome c-type biogenesis protein CcmG/DsbE, thiol: disulfide oxidoreductase                   |
| Ccsp  | Cytochrome c-type synthesis protein                                                               |
| CRD   | Copper resistance protein D                                                                       |
| CopC  | Copper resistance protein CopC                                                                    |
| CopD  | Copper resistance protein CopD                                                                    |
| CopG  | CopG protein                                                                                      |
| CcmH  | Cytochrome c heme lyase subunit CcmH                                                              |
| CcmF  | Cytochrome c heme lyase subunit CcmF                                                              |
| Cbp   | Cytochrome c-type biogenesis protein, putative                                                    |
| CRB   | Copper resistance protein B                                                                       |
| CSA   | Copper/silver efflux P-type ATPase                                                                |
| CcmE  | Cytochrome c-type biogenesis protein CcmE, heme chaperone                                         |
| TR    | Negative transcriptional regulator-copper transport operon                                        |
| copS  | Sensor protein copS (EC 2.7.3.-)                                                                  |
| copR  | Transcriptional activator protein CopR                                                            |
| copCp | Copper resistance protein C precursor                                                             |
| CusS? | Heavy metal sensor histidine kinase                                                               |
| CusR? | DNA-binding heavy metal response regulator                                                        |
| CusS  | Copper sensory histidine kinase CusS                                                              |
| CusR  | Copper-sensing two-component system response regulator CusR                                       |
| 2?    | Heavy metal-(Cd/Co/Hg/Pb/Zn)-translocating P-type ATPase: Heavy metal translocating P-type ATPase |

|       |                                                                                                                                              |
|-------|----------------------------------------------------------------------------------------------------------------------------------------------|
| CZCR  | Cobalt-zinc-cadmium resistance protein                                                                                                       |
| czcD  | Cobalt-zinc-cadmium resistance protein CzcD                                                                                                  |
| zitB  | Zinc transporter ZitB                                                                                                                        |
| DMT   | Permease of the drug/metabolite transporter (DMT) superfamily                                                                                |
| HGH   | Hydroxyacylglutathione hydrolase (EC 3.1.2.6)                                                                                                |
| Dps   | Non-specific DNA-binding protein Dps / Iron-binding ferritin-like antioxidant protein / Ferroxidase (EC 1.16.3.1)                            |
| HNA   | Hypothetical N-acetyltransferase                                                                                                             |
| TA    | Trans-aconitate 2-methyltransferase (EC 2.1.1.144)                                                                                           |
| DMT2  | Putative DMT superfamily metabolite efflux protein precursor                                                                                 |
| RtK   | adherence and invasion membrane-associated protein (Ail, less powerful adhesin than Inv, provides resistance to killing by serum complement) |
| YPO   | Hypothetical protein YPO2504                                                                                                                 |
| pnuCl | Ribosyl nicotinamide transporter, PnuC-like                                                                                                  |
| QS    | Quinolinate synthetase (EC 2.5.1.72)                                                                                                         |
| CzcA  | Cobalt-zinc-cadmium resistance protein CzcA                                                                                                  |
| CzcC  | Heavy metal RND efflux outer membrane protein, CzcC family                                                                                   |
| SEP   | Putative silver efflux pump                                                                                                                  |
| cusB  | Putative copper efflux system protein CusB                                                                                                   |
| FP    | Probable Co/Zn/Cd efflux system membrane fusion protein                                                                                      |
| CzcB  | Cobalt/zinc/cadmium efflux RND transporter, membrane fusion protein, CzcB family                                                             |
| nccB  | Nickel-cobalt-cadmium resistance protein NccB                                                                                                |
| cusA  | Cation efflux system protein CusA                                                                                                            |
| CzrB  | Zn(II) and Co(II) transmembrane diffusion facilitator                                                                                        |
| HME   | Hypothetical protein involved in heavy metal export                                                                                          |
| CzrR  | DNA-binding heavy metal response regulator                                                                                                   |
| HMHK  | Heavy metal sensor histidine kinase                                                                                                          |
| CusR  | Copper-sensing two-component system response regulator CusR                                                                                  |
| CusS  | Copper sensory histidine kinase CusS                                                                                                         |
| cusF  | Cation efflux system protein CusF precursor                                                                                                  |
| cusC  | Cation efflux system protein CusC precursor                                                                                                  |
| TRCd  | Cd(II)/Pb(II)-responsive transcriptional regulator                                                                                           |
| TRMer | Transcriptional regulator, MerR family                                                                                                       |
| HmrR  | Heavy metal resistance transcriptional regulator HmrR                                                                                        |
| nccA  | Nickel-cobalt-cadmium resistance protein NccA                                                                                                |
| PAs   | P pilus assembly/Cpx signaling pathway, periplasmic inhibitor/zinc-resistance associated protein                                             |
| PCT   | Probable cadmium-transporting ATPase (EC 3.6.3.3)                                                                                            |
| CRA   | Cadmium-transporting ATPase (EC 3.6.3.3)                                                                                                     |
| DcyD  | D-cysteine desulfhydrase (EC 4.4.1.15)                                                                                                       |
| CBP   | L-Cystine ABC transporter, periplasmic cystine-binding protein                                                                               |

|       |                                                                         |
|-------|-------------------------------------------------------------------------|
| CPP   | Cystine ABC transporter, permease protein                               |
| CAP   | Cystine ABC transporter, ATP-binding protein                            |
| ZraS  | Sensor protein of zinc sigma-54-dependent two-component system          |
| ZraR  | Response regulator of zinc sigma-54-dependent two-component system      |
| ZraP  | Zinc resistance-associated protein                                      |
| ScsA  | Suppression of copper sensitivity: putative copper-binding protein ScsA |
| ScsB  | Membrane protein, suppressor for copper-sensitivity ScsB                |
| ScsC  | Secreted protein, suppressor for copper-sensitivity ScsC                |
| ScsD  | Membrane protein, suppressor for copper-sensitivity ScsD                |
| CutA  | Periplasmic divalent cation tolerance protein CutA                      |
| CutC  | Cytoplasmic copper homeostasis protein CutC                             |
| CutF  | Copper homeostasis protein CutF precursor                               |
| CutE  | Copper homeostasis protein CutE                                         |
| CorC  | Magnesium and cobalt efflux protein CorC                                |
| FosA  | Fosfomycin resistance protein FosA                                      |
| FosB  | Fosfomycin resistance protein FosB                                      |
| FosX  | Fosfomycin resistance protein FosX                                      |
| parC  | Topoisomerase IV subunit A (EC 5.99.1.-)                                |
| parE  | Topoisomerase IV subunit B (EC 5.99.1.-)                                |
| gyrA  | DNA gyrase subunit A (EC 5.99.1.3)                                      |
| gyrB  | DNA gyrase subunit B (EC 5.99.1.3)                                      |
| Lde   | Efflux pump Lde                                                         |
| BL    | Beta-lactamase (EC 3.5.2.6)                                             |
| BLc   | Beta-lactamase class C and other penicillin-binding proteins            |
| BLI   | Metal-dependent hydrolases of the beta-lactamase superfamily I          |
| BLR   | Negative regulator of beta-lactamase expression                         |
| bl    | Beta-lactamase                                                          |
| BLII  | Metal-dependent hydrolases of the beta-lactamase superfamily II         |
| BLIII | Metal-dependent hydrolases of the beta-lactamase superfamily III        |
| BLA   | Beta-lactamase class A                                                  |
| CTX   | Beta-lactamase CTX-M-16                                                 |
| blaR  | Regulatory protein BlaR1                                                |
| blaI  | Beta-lactamase repressor BlaI                                           |
| BLD   | Beta-lactamase class D                                                  |
| OXA   | Beta-lactamase OXA-18 precursor (EC 3.5.2.6)                            |
| AmpS  | Beta-lactamase AmpS                                                     |
| PSE2  | Beta-lactamase PSE-2 precursor (EC 3.5.2.6)                             |
| ybxI  | Probable beta-lactamase ybxI precursor (EC 3.5.2.6)                     |
| CS    | Beta-lactamase (Cephalosporinase) (EC 3.5.2.6)                          |
| cadA  | Cadmium-transporting ATPase (EC 3.6.3.3)                                |
| cadC  | Cadmium efflux system accessory protein                                 |

|            |                                                                                                            |
|------------|------------------------------------------------------------------------------------------------------------|
| cadD       | Cadmium resistance protein                                                                                 |
| CmeA       | RND efflux system, membrane fusion protein CmeA                                                            |
| CmeB       | RND efflux system, inner membrane transporter CmeB                                                         |
| CmeC       | RND efflux system, outer membrane lipoprotein CmeC                                                         |
| AcrR       | Transcription repressor of multidrug efflux pump acrAB operon, TetR (AcrR) family                          |
| TetR       | Transcription regulator of multidrug efflux pump operon, TetR (AcrR) family                                |
| Reg        | Probable transcription regulator protein of MDR efflux pump cluster                                        |
| MATE_all   | Multi antimicrobial extrusion protein (Na <sup>+</sup> )/drug antiporter), MATE family of MDR efflux pumps |
| YdhE/NorM  | Multidrug and toxin extrusion (MATE) family efflux pump YdhE/NorM                                          |
| YdhE/NorM? | Multidrug and toxin extrusion (MATE) family efflux pump YdhE/NorM, homolog                                 |
| MFS        | Multidrug-efflux transporter, major facilitator superfamily (MFS) (TC 2.A.1)                               |
| VNT        | Vesicular neurotransmitter transporter                                                                     |
| MacA       | Macrolide-specific efflux protein MacA                                                                     |
| MacB       | Macrolide export ATP-binding/permease protein MacB (EC 3.6.3.-)                                            |
| OML        | RND efflux system, outer membrane lipoprotein, NodT family                                                 |
| TolC_14    | Type I secretion outer membrane protein, TolC precursor                                                    |
| MtrF       | Multidrug efflux pump component MtrF                                                                       |
| RND        | Membrane fusion protein of RND family multidrug efflux pump                                                |
| AcrB       | Acriflavin resistance protein                                                                              |
| OM         | Probable outer membrane component of multidrug efflux pump                                                 |
| MexD       | Multidrug efflux RND transporter MexD                                                                      |
| MexC       | Multidrug efflux RND membrane fusion protein MexC                                                          |
| NfxB       | Transcriptional regulator NfxB                                                                             |
| PmrA       | Multidrug resistance efflux pump PmrA                                                                      |

#### **Invasion and intracellular resistance**

|        |                                                                       |
|--------|-----------------------------------------------------------------------|
| Rv0682 | SSU ribosomal protein S12p (S23e)                                     |
| Rv0683 | SSU ribosomal protein S7p (S5e)                                       |
| Rv0684 | Translation elongation factor G                                       |
| Rv0685 | Translation elongation factor Tu                                      |
| Rv0686 | FIG025093: Probable membrane protein                                  |
| Rv0666 | FIG108202: hypothetical protein                                       |
| Rv0667 | DNA-directed RNA polymerase beta subunit (EC 2.7.7.6)                 |
| Rv0668 | DNA-directed RNA polymerase beta' subunit (EC 2.7.7.6)                |
| Rv1594 | Quinolinate synthetase (EC 2.5.1.72)                                  |
| Rv1595 | L-aspartate oxidase (EC 1.4.3.16)                                     |
| Rv1596 | Quinolinate phosphoribosyltransferase [decarboxylating] (EC 2.4.2.19) |
| Rv1641 | Translation initiation factor 3                                       |

|        |                            |
|--------|----------------------------|
| Rv1642 | LSU ribosomal protein L35p |
| Rv1643 | LSU ribosomal protein L20p |

### **Auxin biosynthesis**

|        |                                                      |
|--------|------------------------------------------------------|
| APRT   | Anthranilate phosphoribosyltransferase (EC 2.4.2.18) |
| PRAI   | Phosphoribosylanthranilate isomerase (EC 5.3.1.24)   |
| IGS    | Indole glycerophosphate synthase                     |
| TSa    | Tryptophan synthase alpha chain (EC 4.2.1.20)        |
| TSb    | Tryptophan synthase beta chain (EC 4.2.1.20)         |
| TM     | tryptophan monooxygenase                             |
| IAH    | Indole-acetamide hydrolase                           |
| N3     | Nitrilase 1 (EC 3.5.5.1)                             |
| TT     | Tryptophan transaminase                              |
| IPAC   | Indole-3-pyruvate decarboxylase (EC 4.1.1.74)        |
| IAD    | Indole-acetaldehyde dehydrogenase                    |
| AAD    | Aromatic-L-amino-acid decarboxylase (EC 4.1.1.28)    |
| AO     | Monoamine oxidase (1.4.3.4)                          |
| IAR    | Indole-acetaldehyde reductase                        |
| TO     | Tryptophol oxidase                                   |
| BoundA | Indole-3-acetate beta-glucosyltransferase            |
| ATFS   | Flavonol 3-sulfotransferase (EC 2.8.2.25)            |
| N2     | Nitrilase 2 (EC 3.5.5.1)                             |
| AUX1   | Putative AUX1-like permease                          |

### **Phosphorus metabolism**

|          |                                                                                      |
|----------|--------------------------------------------------------------------------------------|
| PepM     | Phosphoenolpyruvate phosphomutase (EC 5.4.2.9)                                       |
| deCO2    | Phosphonopyruvate decarboxylase (EC 4.1.1.82)                                        |
| 2-APAT   | 2-aminoethylphosphonate:pyruvate aminotransferase (EC 2.6.1.37)                      |
| SPAT     | Serine-pyruvate aminotransferase/archaeal aspartate aminotransferase                 |
| PhoU?    | Distant similarity with phosphate transport system regulator                         |
| PhoU     | Phosphate transport system regulatory protein PhoU                                   |
| pstS     | Phosphate ABC transporter, periplasmic phosphate-binding protein PstS (TC 3.A.1.7.1) |
| PstS?    | Putative periplasmic phosphate-binding protein PstS (Mycoplasma type)                |
| PstS_hal | Putative periplasmic phosphate-binding protein PstS (Halobacteriales type)           |
| PstS_c   | Putative periplasmic phosphate-binding protein PstS (Catenulisporaceae type)         |
| PstA     | Phosphate transport system permease protein PstA (TC 3.A.1.7.1)                      |

|           |                                                                                                 |
|-----------|-------------------------------------------------------------------------------------------------|
| PstB      | Phosphate transport ATP-binding protein PstB (TC 3.A.1.7.1)                                     |
| PstC      | Phosphate transport system permease protein PstC (TC 3.A.1.7.1)                                 |
| PhoP      | Alkaline phosphatase synthesis transcriptional regulatory protein PhoP                          |
| PhoR      | Phosphate regulon sensor protein PhoR (SphS) (EC 2.7.13.3)                                      |
| PhoB      | Phosphate regulon transcriptional regulatory protein PhoB (SphR)                                |
| PPiK      | Polyphosphate kinase (EC 2.7.4.1)                                                               |
| PPiase    | Exopolyphosphatase (EC 3.6.1.11)                                                                |
| OprO      | Pyrophosphate-specific outer membrane porin OprO                                                |
| OprP      | Phosphate-specific outer membrane porin OprP                                                    |
| DrrA_PhoP | response regulator DrrA                                                                         |
| PstSp??   | Putative phosphate ABC transporter, phosphate-binding component                                 |
| IPP       | Inorganic pyrophosphatase (EC 3.6.1.1)                                                          |
| THb       | NAD(P) transhydrogenase subunit beta (EC 1.6.1.2)                                               |
| THa       | NAD(P) transhydrogenase alpha subunit (EC 1.6.1.2)                                              |
| PhoHv     | Phosphate starvation-inducible protein PhoH, predicted ATPase                                   |
| SAP       | secreted alkaline phosphatase                                                                   |
| phoP      | Alkaline phosphatase synthesis transcriptional regulatory protein PhoP                          |
| phoQ      | response regulator in two-component regulatory system with PhoQ                                 |
| TH2       | Soluble pyridine nucleotide transhydrogenase (EC 1.6.1.1)                                       |
| ASGA      | 1-acyl-sn-glycerol-3-phosphate acyltransferase (EC 2.3.1.51)                                    |
| YggT      | Integral membrane protein YggT, involved in response to extracytoplasmic stress (osmotic shock) |
| ALPT      | Apolipoprotein N-acyltransferase (EC 2.3.1.-)                                                   |
| corC      | Magnesium and cobalt efflux protein CorC                                                        |
| MH        | Metal-dependent hydrolase YbeY, involved in rRNA and/or ribosome maturation and assembly        |
| MDIP      | Manganese-dependent inorganic pyrophosphatase (EC 3.6.1.1)                                      |
| AP        | Alkaline phosphatase (EC 3.1.3.1)                                                               |
| PhoQ      | PhoQ                                                                                            |
| LAT       | Low-affinity inorganic phosphate transporter                                                    |
| PLAT      | Probable low-affinity inorganic phosphate transporter                                           |

|          |                                                                                      |
|----------|--------------------------------------------------------------------------------------|
| PhoUh    | Phosphate transport regulator (distant homolog of PhoU)                              |
| PPK      | Polyphosphate kinase (EC 2.7.4.1)                                                    |
| EPP      | Exopolyphosphatase (EC 3.6.1.11)                                                     |
| GDP      | Guanosine-5'-triphosphate,3'-diphosphate pyrophosphatase (EC 3.6.1.40)               |
| PhoU     | Phosphate transport system regulatory protein PhoU                                   |
| NaPi     | Sodium-dependent phosphate transporter                                               |
| API      | Alkaline phosphatase like protein                                                    |
| AP?      | putative alkaline phosphatase-like protein                                           |
| PhoH?    | Predicted ATPase related to phosphate starvation-inducible protein PhoH              |
| EPP?GPP? | Phosphatase, Ppx/GppA family                                                         |
| PEPP     | Pyrophosphate-energized proton pump (EC 3.6.1.1)                                     |
| PhoR     | Phosphate regulon sensor protein PhoR (SphS) (EC 2.7.13.3)                           |
| PhoB     | Phosphate regulon transcriptional regulatory protein PhoB (SphR)                     |
| PhoU?    | Distant similarity with phosphate transport system regulator                         |
| ptsS     | Phosphate ABC transporter, periplasmic phosphate-binding protein PstS (TC 3.A.1.7.1) |
| ptsS?    | Putative periplasmic phosphate-binding protein PstS (Mycoplasma type)                |
| ptsA     | Phosphate transport system permease protein PstA (TC 3.A.1.7.1)                      |
| ptsC     | Phosphate transport system permease protein PstC (TC 3.A.1.7.1)                      |
| ptsB     | Phosphate transport ATP-binding protein PstB (TC 3.A.1.7.1)                          |
| OprO     | Pyrophosphate-specific outer membrane porin OprO                                     |
| OprP     | Phosphate-specific outer membrane porin OprP                                         |
| PpaX     | Inorganic pyrophosphatase PpaX (EC 3.1.3.18)                                         |
| ET1      | Phosphate permease PHO89 (Na <sup>+</sup> )/Pi cotransporter PHO89)                  |
| PpaX2    | Pyrophosphatase PpaX (EC 3.6.1.1)                                                    |
| Ppx      | Exopolyphosphatase (EC 3.6.1.11)                                                     |
| Ppk      | Polyphosphate kinase (EC 2.7.4.1)                                                    |
| Ppk2     | Polyphosphate kinase 2 (EC 2.7.4.1)                                                  |
| Gdp      | Guanosine-5'-triphosphate,3'-diphosphate pyrophosphatase (EC 3.6.1.40)               |
| PPGK     | Polyphosphate glucokinase (EC 2.7.1.63)                                              |



PPN1                      Endopolyphosphatase (EC 3.6.1.10)

### **Siderophores**

|          |                                                                                                |
|----------|------------------------------------------------------------------------------------------------|
| Sdab     | Siderophore biosynthesis diaminobutyrate--2-oxoglutarate aminotransferase (EC 2.6.1.76)        |
| Sdad     | Siderophore biosynthesis L-2,4-diaminobutyrate decarboxylase                                   |
| SSlAc    | Siderophore synthetase large component, acetyltransferase                                      |
| SSsAc    | Siderophore synthetase small component, acetyltransferase                                      |
| SSLc     | Siderophore synthetase component, ligase                                                       |
| SbsM     | Siderophore biosynthesis protein, monooxygenase                                                |
| LCFAL    | Long-chain-fatty-acid--CoA ligase of siderophore biosynthesis                                  |
| STra     | Siderophore transport protein                                                                  |
| STonBrec | TonB-dependent siderophore receptor                                                            |
| FeSRTon  | Ferric siderophore receptor, TonB dependent                                                    |
| Sperm    | Siderophore related permease                                                                   |
| FhuA     | Ferric hydroxamate outer membrane receptor FhuA                                                |
| FhuB     | Ferric hydroxamate ABC transporter (TC 3.A.1.14.3), permease component FhuB                    |
| FhuC     | Ferric hydroxamate ABC transporter (TC 3.A.1.14.3), ATP-binding protein FhuC                   |
| FhuD     | Ferric hydroxamate ABC transporter (TC 3.A.1.14.3), periplasmic substrate binding protein FhuD |
| FeSB     | Iron-siderophore transport system, substrate-binding component                                 |
| FeTM     | Iron-siderophore transport system, transmembran component                                      |
| FeP      | Iron-siderophore transport system, permease component                                          |
| FeATP    | Iron-siderophore transport system, ATP-binding component                                       |
| PchR     | Transcriptional regulator PchR                                                                 |
| PchA     | Isochorismate synthase (EC 5.4.4.2) of siderophore biosynthesis                                |
| PchB     | Isochorismate pyruvate-lyase (EC 4.-.-.-) of siderophore biosynthesis                          |
| PchC     | Thioesterase in siderophore biosynthesis gene cluster                                          |
| PchD     | 2,3-dihydroxybenzoate-AMP ligase (EC 2.7.7.58) of siderophore biosynthesis                     |

|          |                                                                                             |
|----------|---------------------------------------------------------------------------------------------|
| DHBAMPL1 | 2,3-dihydroxybenzoate-AMP ligase (EC 2.7.7.58)                                              |
| PchEPchF | Siderophore biosynthesis non-ribosomal peptide synthetase modules                           |
| PchG     | ThiazolinyI imide reductase in siderophore biosynthesis gene cluster                        |
| PchHPchI | Putative ABC iron siderophore transporter, fused permease and ATPase domains                |
| CycPep   | ABC-type siderophore export system, fused ATPase and permease components                    |
| FptA     | Outer membrane receptor for ferric siderophore                                              |
| FtpB     | Hypothetical protein FtpB in siderophore gene cluster                                       |
| FtpC     | Putative iron-regulated membrane protein in siderophore cluster                             |
| FptX     | Inner-membrane permease for ferric siderophore                                              |
| ICM      | Isochorismatase (EC 3.3.2.1) of siderophore biosynthesis                                    |
| BDH      | 2,3-dihydro-2,3-dihydroxybenzoate dehydrogenase (EC 1.3.1.28) of siderophore biosynthesis   |
| FeR      | Ferric reductase (1.6.99.14)                                                                |
| PchK     | Putative reductoisomerase in siderophore biosynthesis gene cluster                          |
| ABCp     | ABC-type Fe <sup>3+</sup> -siderophore transport system, permease component                 |
| ABCatp   | ABC-type Fe <sup>3+</sup> -siderophore transport system, ATPase component                   |
| ABCsb    | ABC-type Fe <sup>3+</sup> -siderophore transport system, periplasmic iron-binding component |
| ABCp2    | ABC-type Fe <sup>3+</sup> -siderophore transport system, permease 2 component               |
| Tonhem   | TonB-dependent hemin receptor                                                               |
| hmuU     | Hemin ABC transporter, permease protein                                                     |
| hmuV     | ABC-type hemin transport system, ATPase component                                           |
| hmuT     | Periplasmic hemin-binding protein                                                           |
| hmuS     | Hemin transport protein HmuS                                                                |
| hmuR     | TonB-dependent hemin , ferrichrome receptor                                                 |
| estlip   | Esterase/lipase in siderophore cluster                                                      |
| Hyp1     | Antibiotic biosynthesis monooxygenase domain-containing protein                             |
| AsbA     | Anthrachelin biosynthesis protein AsbA                                                      |
| AsbB     | Anthrachelin biosynthesis protein AsbB                                                      |

|         |                                                                                                           |
|---------|-----------------------------------------------------------------------------------------------------------|
| SiderX3 | Long-chain-fatty-acid--CoA ligase associated with anthrachelin biosynthesis                               |
| SiderX4 | Hypothetical protein GBAA1985 associated with anthrachelin biosynthesis, unique                           |
| SiderX5 | Hypothetical protein GBAA1986 associated with anthrachelin biosynthesis, isomerase-like TIM barrel domain |
| SiderX6 | Acyl carrier protein associated with anthrachelin biosynthesis                                            |
| X-ABC1  | Uncharacterized iron compound ABC uptake transporter, substrate-binding protein                           |
| X-ABC2  | Uncharacterized iron compound ABC uptake transporter, permease protein                                    |
| X-ABC3  | Uncharacterized iron compound ABC uptake transporter, ATP-binding protein                                 |
| Fe-ABC1 | Iron compound ABC uptake transporter substrate-binding protein                                            |
| Fe-ABC2 | Iron compound ABC uptake transporter permease protein                                                     |

#### **Osmotic stress response**

|           |                                                                               |
|-----------|-------------------------------------------------------------------------------|
| Aqua      | Aquaporin Z                                                                   |
| Glycerol  | Glycerol uptake facilitator protein                                           |
| Prop(OH)2 | Propanediol diffusion facilitator                                             |
| OmpA      | Outer membrane protein A precursor                                            |
| OsmY      | Osmotically inducible protein OsmY                                            |
| BetA      | Choline dehydrogenase (EC 1.1.99.1)                                           |
| BetB      | Betaine aldehyde dehydrogenase (EC 1.2.1.8)                                   |
| BetT      | High-affinity choline uptake protein BetT                                     |
| BetC      | Choline-sulfatase (EC 3.1.6.6)                                                |
| BetI      | HTH-type transcriptional regulator BetI                                       |
| OpuD      | Glycine betaine transporter OpuD                                              |
| OpuAA     | Glycine betaine ABC transport system, ATP-binding protein OpuAA (EC 3.6.3.32) |
| OpuAB     | Glycine betaine ABC transport system, permease protein OpuAB                  |
| OpuAC     | Glycine betaine ABC transport system, glycine betaine-binding protein OpuAC   |
| OpuABC    | Glycine betaine ABC transport system, permease/glycine betaine-binding        |

|       |                                                                                               |
|-------|-----------------------------------------------------------------------------------------------|
|       | protein OpuABC                                                                                |
| OpuC  | Glycine betaine/L-proline ABC transporter, glycine betaine/L-proline-binding/permease protein |
| ProX  | L-proline glycine betaine binding ABC transporter protein ProX (TC 3.A.1.12.1)                |
| ProV  | L-proline glycine betaine ABC transport system permease protein ProV (TC 3.A.1.12.1)          |
| ProW  | L-proline glycine betaine ABC transport system permease protein ProW (TC 3.A.1.12.1)          |
| ProZ  | Glycine betaine ABC transport system permease protein                                         |
| CodA  | Choline oxidase (E.C. 1.1.3.17)                                                               |
| OpuBA | Choline ABC transport system, ATP-binding protein OpuBA                                       |
| OpuBB | Choline ABC transport system, permease protein OpuBB                                          |
| OpuBC | Choline ABC transport system, choline-binding protein OpuBC                                   |
| OpuBD | Choline ABC transport system, permease protein OpuBD                                          |
| GbsB  | Alcohol dehydrogenase GbsB (type III ), essential for the utilization of choline (EC 1.1.1.1) |
| OpuCC | Osmotically activated L-carnitine/choline ABC transporter, substrate-binding protein OpuCC    |
| OpuCD | Osmotically activated L-carnitine/choline ABC transporter, permease protein OpuCD             |
| OpuCB | Osmotically activated L-carnitine/choline ABC transporter, permease protein OpuCB             |
| OpuCA | Osmotically activated L-carnitine/choline ABC transporter, ATP-binding protein OpuCA          |
| SoxA  | Sarcosine oxidase alpha subunit (EC 1.5.3.1)                                                  |
| SoxB  | Sarcosine oxidase beta subunit (EC 1.5.3.1)                                                   |
| SoxD  | Sarcosine oxidase delta subunit (EC 1.5.3.1)                                                  |
| SoxG  | Sarcosine oxidase gamma subunit (EC 1.5.3.1)                                                  |
| ChD   | Choline binding protein D                                                                     |
| ChA   | Choline binding protein A                                                                     |
| GbcA  | GbcA Glycine betaine demethylase subunit A                                                    |
| GbcB  | GbcB Glycine betaine demethylase subunit B                                                    |

### **Oxidative stress response**

|      |                                                                         |
|------|-------------------------------------------------------------------------|
| sodA | Manganese superoxide dismutase (EC 1.15.1.1)                            |
| sodB | Superoxide dismutase [Fe] (EC 1.15.1.1)                                 |
| sodC | Superoxide dismutase [Cu-Zn] precursor (EC 1.15.1.1)                    |
| HPII | Catalase (EC 1.11.1.6)                                                  |
| HPI  | Peroxidase (EC 1.11.1.7)                                                |
| CCP  | Cytochrome c551 peroxidase (EC 1.11.1.5)                                |
| NSTR | Nitrite-sensitive transcriptional repressor NsrR                        |
| BphO | bacteriophytochrome heme oxygenase BphO                                 |
| PCh  | Phytochrome, two-component sensor histidine kinase (EC 2.7.3.-)         |
| IBP  | Iron-binding ferritin-like antioxidant protein                          |
| Dps  | Non-specific DNA-binding protein Dps                                    |
| Fr   | Ferroxidase (EC 1.16.3.1)                                               |
| PRP  | DNA binding protein starved cells-like peroxide resistance protein      |
| Rex  | Redox-sensitive transcriptional regulator (AT-rich DNA-binding protein) |
| SoxR | Redox-sensitive transcriptional activator SoxR                          |
| SoxS | Regulatory protein SoxS                                                 |
| OxyR | Hydrogen peroxide-inducible genes activator                             |
| Furp | Ferric uptake regulation protein                                        |
| Fnr  | Fumarate and nitrate reduction regulatory protein                       |
| FurI | transcriptional regulator, Fur family                                   |
| FeZn | Fe <sup>2+</sup> /Zn <sup>2+</sup> uptake regulation proteins           |
| Crp  | transcriptional regulator, Crp/Fnr family                               |
| NnrS | NnrS protein involved in response to NO                                 |
| MTN  | Metallothionein                                                         |
| PIPA | Paraquat-inducible protein A                                            |
| PIPB | Paraquat-inducible protein B                                            |
| AhpC | Alkyl hydroperoxide reductase subunit C-like protein                    |
| PerR | Peroxide stress regulator                                               |
| HPII | Catalase HPII (EC 1.11.1.6)                                             |

|          |                                                            |
|----------|------------------------------------------------------------|
| HPI_24   | Peroxidase/catalase HPI (EC 1.11.1.6)                      |
| C22      | Alkyl hydroperoxide reductase C22 protein (EC 1.8.1.-)     |
| TR       | Transcriptional regulator, Crp/Fnr family                  |
| FUR2     | Transcriptional regulator, FUR family                      |
| Irr      | Iron-responsive regulator Irr                              |
| ZUR      | Zinc uptake regulation protein ZUR                         |
| FUR      | Ferric uptake regulation protein FUR                       |
| PerR2    | Peroxide stress regulator PerR, FUR family                 |
| Osmcl    | Organic hydroperoxide resistance transcriptional regulator |
| OsmclR   | Organic hydroperoxide resistance protein                   |
| HPIIb    | Catalase (EC 1.11.1.6)                                     |
| HPI_35   | Peroxidase (EC 1.11.1.7)                                   |
| SODA     | Manganese superoxide dismutase (EC 1.15.1.1)               |
| SODB     | Superoxide dismutase [Fe] (EC 1.15.1.1)                    |
| SODC     | Superoxide dismutase [Cu-Zn] precursor (EC 1.15.1.1)       |
| RTH      | Rubrerythrin                                               |
| SOR      | Superoxide reductase (EC 1.15.1.2)                         |
| SODFe/Mn | Superoxide dismutase [Mn/Fe] (EC 1.15.1.1)                 |
| SODMn    | Superoxide dismutase [Mn] (EC 1.15.1.1)                    |
| SOD?     | Superoxide dismutase (EC 1.15.1.1)                         |
| SODFe/Zn | superoxide dismutase [Fe-Zn] (EC 1.15.1.1)                 |
| HemO     | Heme oxygenase HemO, associated with heme uptake           |
| TP       | Thioredoxin peroxidase 1 (EC 1.6.4.-)                      |
| PR       | Probable peroxiredoxin (EC 1.11.1.15)                      |
| GT_a     | Glutathione S-transferase, alpha (EC 2.5.1.18)             |
| GT_d     | Glutathione S-transferase, delta (EC 2.5.1.18)             |
| GT_e     | Glutathione S-transferase, epsilon (EC 2.5.1.18)           |
| GT_f     | Glutathione S-transferase, phi (EC 2.5.1.18)               |
| GT_k     | Glutathione S-transferase, kappa (EC 2.5.1.18)             |
| GT_m     | Glutathione S-transferase, mu (EC 2.5.1.18)                |

|       |                                                                                                  |
|-------|--------------------------------------------------------------------------------------------------|
| GT_om | Glutathione S-transferase, omega (EC 2.5.1.18)                                                   |
| GT_p  | Glutathione S-transferase, pi (EC 2.5.1.18)                                                      |
| GT_t  | Glutathione S-transferase, theta (EC 2.5.1.18)                                                   |
| GT_z  | Glutathione S-transferase, zeta (EC 2.5.1.18)                                                    |
| GT_u  | Glutathione S-transferase, unnamed subgroup (EC 2.5.1.18)                                        |
| GT_u2 | Glutathione S-transferase, unnamed subgroup 2 (EC 2.5.1.18)                                      |
| GT_St | Glutathione S-transferase, Streptococcal type (EC 2.5.1.18)                                      |
| GST   | Glutathione S-transferase (EC 2.5.1.18)                                                          |
| YfcF  | Probable glutathione S-transferase (EC 2.5.1.18), YfcF homolog                                   |
| YfcG  | Probable glutathione S-transferase (EC 2.5.1.18), YfcG homolog                                   |
| Hyp1  | Uncharacterized glutathione S-transferase-like protein                                           |
| Hyp3  | Distant similarity with leukotriene C4 synthase (microsomal glutathione S-transferase)           |
| YncG  | Uncharacterized GST-like protein yncG                                                            |
| YibF  | Uncharacterized GST-like protein yibF                                                            |
| YghU  | Uncharacterized GST-like protein yghU associated with glutathionylspermidine synthetase/amidase  |
| Hyp4  | Glutathione S-transferase family protein                                                         |
| MGS   | Methylglyoxal synthase (EC 4.2.3.3)                                                              |
| GloA  | Lactoylglutathione lyase (EC 4.4.1.5)                                                            |
| GloB  | Hydroxyacylglutathione hydrolase (EC 3.1.2.6)                                                    |
| SAM1  | FIG005121: SAM-dependent methyltransferase (EC 2.1.1.-)                                          |
| SAM2  | SAM-dependent methyltransferase 2, in cluster with Hydroxyacylglutathione hydrolase (EC 3.1.2.6) |
| GloB? | Similar to Hydroxyacylglutathione hydrolase, but in an organism lacking glutathione biosynthesis |
| PCS_b | Phytochelatin synthase (EC 2.3.2.15), bacterial type                                             |
| PCS_e | Phytochelatin synthase (EC 2.3.2.15), eukaryotic type                                            |
| GshA  | Glutamate--cysteine ligase (EC 6.3.2.2)                                                          |
| GshAe | Glutamate--cysteine ligase eukaryotic (EC 6.3.2.2)                                               |
| GshAd | Glutamate--cysteine ligase (EC 6.3.2.2), divergent, of Alpha- and Beta-proteobacteria type       |

|       |                                                                                                       |
|-------|-------------------------------------------------------------------------------------------------------|
| GshB  | Glutathione synthetase (EC 6.3.2.3)                                                                   |
| GshBd | Predicted alternative glutathione synthetase (EC 6.3.2.3)                                             |
| AB    | Glutathione biosynthesis bifunctional protein gshF (EC 6.3.2.2)(EC 6.3.2.3)                           |
| YcbL  | Hypothetical metal-binding enzyme, YcbL homolog                                                       |
| GR    | Glutathione reductase (EC 1.8.1.7)                                                                    |
| GPX   | Glutathione peroxidase (EC 1.11.1.9)                                                                  |
| GRX1  | Glutaredoxin 1                                                                                        |
| GRX2  | Glutaredoxin 2                                                                                        |
| GRX3  | Glutaredoxin 3                                                                                        |
| GRX31 | Glutaredoxin 3 (Grx1)                                                                                 |
| GRX32 | Glutaredoxin 3 (Grx2)                                                                                 |
| GRX33 | Glutaredoxin 3 (Grx3)                                                                                 |
| GRX   | Glutaredoxin                                                                                          |
| MTGR? | Uncharacterized monothiol glutaredoxin ycf64-like                                                     |
| GRX?  | Glutaredoxin-related protein                                                                          |
| NrdH  | Glutaredoxin-like protein NrdH, required for reduction of Ribonucleotide reductase class Ib           |
| NR    | Ribonucleotide reductase of class Ib (aerobic), alpha subunit (EC 1.17.4.1)                           |
| Hyp1  | Glutathione peroxidase family protein                                                                 |
| MTGR  | Uncharacterized monothiol glutaredoxin ycf64-like                                                     |
| GR3   | Glutaredoxin 3                                                                                        |
| GR31  | Glutaredoxin 3 (Grx1)                                                                                 |
| GR32  | Glutaredoxin 3 (Grx2)                                                                                 |
| GR33  | Glutaredoxin 3 (Grx3)                                                                                 |
| GR1   | Glutaredoxin 1                                                                                        |
| AUX2  | Protein export cytoplasm chaperone protein (SecB, maintains protein to be exported in unfolded state) |
| AUX3  | Glycerol-3-phosphate dehydrogenase [NAD(P)+] (EC 1.1.1.94)                                            |
| AUX4  | tRNA (cytidine(34)-2'-O)-methyltransferase (EC 2.1.1.207) ## TrmL                                     |
| AUX5  | Competence protein F homolog, phosphoribosyltransferase domain                                        |
| AUX6  | Glutathione synthetase (EC 6.3.2.3)                                                                   |



|           |                                                                                                         |
|-----------|---------------------------------------------------------------------------------------------------------|
| AUX7      | Phosphocarrier protein, nitrogen regulation associated                                                  |
| AUX8      | ATP/GTP-binding site motif A (P-loop) :BolA-like protein                                                |
| AUX9      | Cell wall endopeptidase, family M23/M37                                                                 |
| EnvC/YibP | Periplasmic septal ring factor with murein hydrolase activity EnvC/YibP                                 |
| RLDP      | Rhodanese-like domain protein                                                                           |
| RLDP1     | FIG136845: Rhodanese-related sulfurtransferase                                                          |
| AUX10     | Multidrug resistance protein Atm1                                                                       |
| AUX11a    | Chaperone protein HscB                                                                                  |
| AUX11b    | Chaperone protein HscA                                                                                  |
| grlA      | Probable monothiol glutaredoxin GrlA                                                                    |
| GRR       | Glutaredoxin-related protein                                                                            |
| AUX12     | Peptide chain release factor 1                                                                          |
| AUX1      | Cell division protein BolA                                                                              |
| AUX13     | TrkA, Potassium channel-family protein                                                                  |
| AUX14     | 23S rRNA (Uracil-5-) -methyltransferase rumB (EC 2.1.1.-)                                               |
| AUX15     | Oxygen-insensitive NADPH nitroreductase (EC 1.-.-.)                                                     |
| GR_N?     | Glutaredoxin                                                                                            |
| AUX16     | Riboflavin kinase (EC 2.7.1.26)                                                                         |
| AUX17     | Flavohemoprotein (Hemoglobin-like protein) (Flavohemoglobin) (Nitric oxide dioxygenase) (EC 1.14.12.17) |
| AUX18     | Thiol-disulfide isomerase                                                                               |
| AUX19     | NAD-dependent glyceraldehyde-3-phosphate dehydrogenase (EC 1.2.1.12)                                    |
| GR2       | Glutaredoxin 2                                                                                          |
| GRNrdH    | Glutaredoxin-like protein NrdH, required for reduction of Ribonucleotide reductase class Ib             |
| YghU      | Uncharacterized GST-like protein yghU associated with glutathionylspermidine synthetase/amidase         |
| GTSS      | Glutathionylspermidine synthase (EC 6.3.1.8)                                                            |
| GTSA      | Glutathionylspermidine amidohydrolase (EC 3.5.1.78)                                                     |
| TrypS     | Trypanothione synthetase (EC 6.3.1.9)                                                                   |
| Hyp1      | Similarity with glutathionylspermidine synthase (EC 6.3.1.8), group 1                                   |

Hyp2

Similarity with glutathionylspermidine synthase (EC 6.3.1.8), group 2
